# Supplementary material
Source: PubMed Central journal article supplement (PMC4036578)
Supplement: supp_tpc.114.123307_tpc123307Supplemental.pdf [file supp_tpc.114.123307_tpc123307Supplemental.pdf]

## Supplemental Figure 1

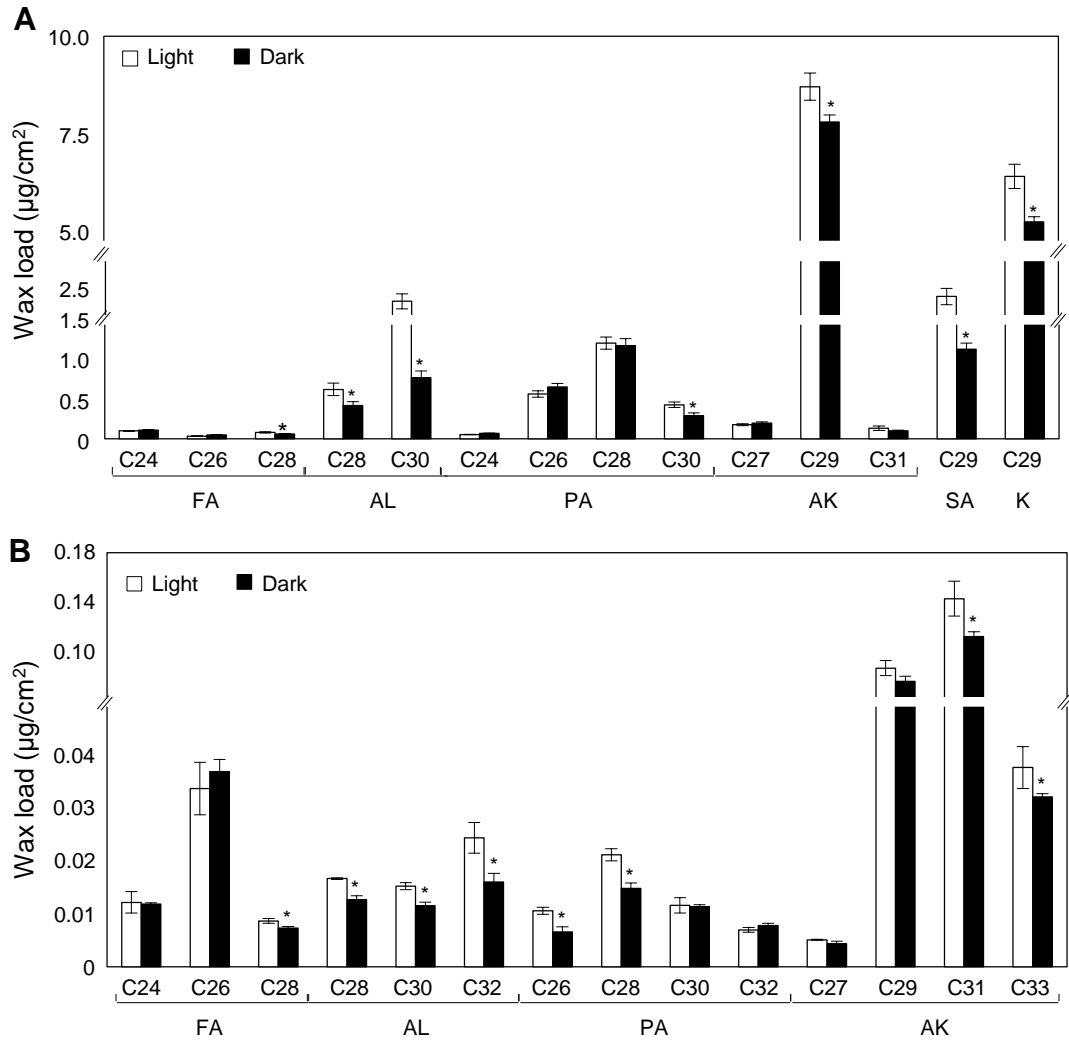

**Supplemental Figure 1.** Cuticular Wax Amounts and Composition from Stems and Leaves of *Arabidopsis* under Long-Day and Dark Conditions.

Cuticular wax amounts and composition from stems (**A**) and leaves (**B**) of 3- and 5-week-old *Arabidopsis* wild type Plants, which were Grown under long-day conditions (16 h light/ 8 h dark, Control) and in the dark for 6 days (dark) were analyzed by gas chromatography (GC) and GC-mass spectrophotometry. Data were statistically analyzed using Student's *t*-test (\*  $P < 0.01$ ). Error bars indicate  $\pm$  SE from triplicate experiments. FA, fatty acids; AL, aldehydes; PA, primary alcohols; AK, alkanes; SA, secondary alcohols; K, Ketone.

## Supplemental Figure 2

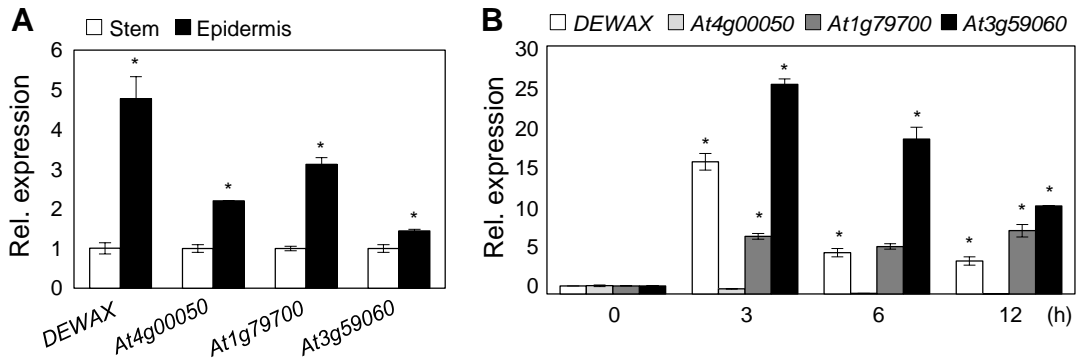

### Supplemental Figure 2. qRT-PCR Analysis of Four Genes Encoding Transcription Factors.

**(A)** qRT-PCR analysis of four genes in *Arabidopsis* stems and stem epidermal peels. Total RNAs were extracted from stems and stem epidermal peels of 5-week-old plants and subjected to qRT-PCR analysis. Data were statistically analyzed using Student's *t*-test (\*  $P < 0.01$ ). Error bars indicate  $\pm$  SD from triplicate experiments.

**(B)** qRT-PCR analysis of four genes in *Arabidopsis* stems after dark treatment. Five-week-old wild type plants grown under long-day conditions were transferred to dark conditions and stems were harvested 0, 3, 6, and 12 h after dark treatment. Total RNAs were extracted from each sample and subjected to qRT-PCR analysis. Data were statistically analyzed using Student's *t*-test (\*  $P < 0.01$ ). Error bars indicate  $\pm$  SD from triplicate experiments.

## Supplemental Figure 3

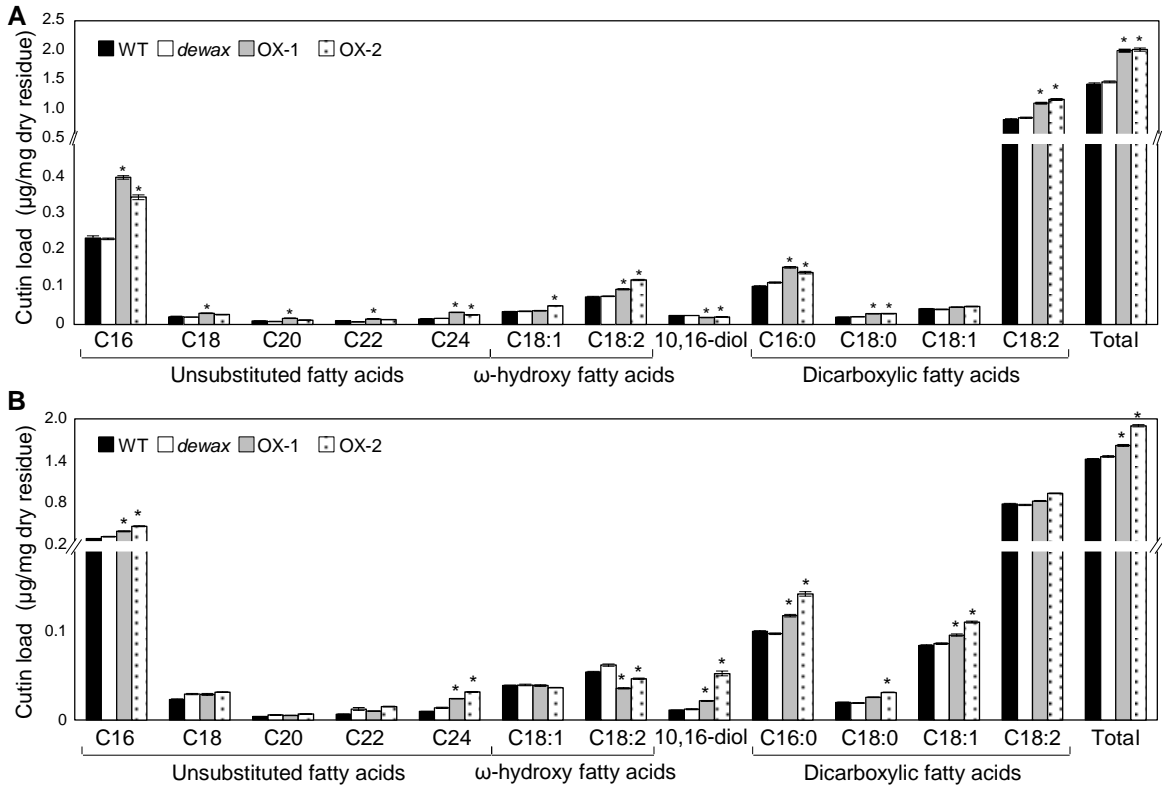

**Supplemental Figure 3.** Cutin Monomer Amounts and Composition in Stems and Leaves of Wild Type, *dewax*, and *DEWAX* Overexpression Lines.

Cutin monomer amounts and composition in stems (**A**) and leaves (**B**) of wild type, *dewax*, and *DEWAX* overexpression lines. Stems and leaves of 5-week-old wild type (WT), *dewax*, and overexpressing *DEWAX* lines (OX-1 and OX-2) were lyophilized, delipidated, and hydrolyzed, and then lipid-soluble extracts were analyzed using GC and GC-mass spectrometry. Data were statistically analyzed using Student's *t*-test (\*  $P < 0.01$ ). Error bars indicate  $\pm$  SE from triplicate experiments.

## Supplemental Figure 4

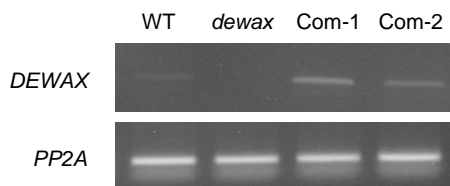

**Supplemental Figure 4.** Accumulation of *DEWAX* Transcripts in Leaves of Wild Type, *dewax*, and Complementation lines of *dewax*.

Total RNAs were extracted from leaves of wild type (WT), *dewax*, and complementation lines (Com-1 and Com-2) of *dewax* and subjected to reverse-transcription-PCR (RT-PCR) analysis. The similar results were obtained from triplicate experiments. *PP2A* was used to determine the quantity and quality of the cDNAs.

## Supplemental Figure 5

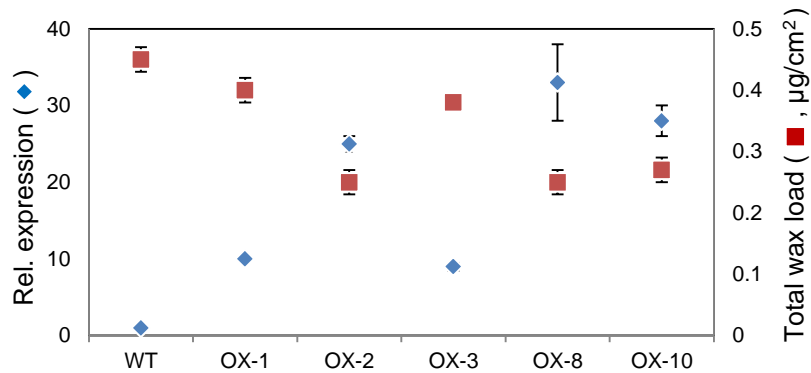

**Supplemental Figure 5.** *DEWAX* Transcript Accumulation and Total Wax Amounts in Leaves of Wild Type and *DEWAX* Overexpression Lines.

Total RNAs were extracted from leaves of wild type (WT) and *DEWAX* overexpression lines (OX-1, OX-2, OX-3, OX-4 and OX-5) and subjected to quantitative reverse-transcription-PCR (qRT-PCR) analysis. Error bars indicate  $\pm$  SE from triplicate experiments. Cuticular waxes were extracted from leaves of 3-week-old *Arabidopsis* wild type and *DEWAX* Overexpression Lines with chloroform and analyzed by gas chromatography (GC) and GC-mass spectrophotometry. Error bars indicate  $\pm$  SE from triplicate experiments.

## Supplemental Figure 6

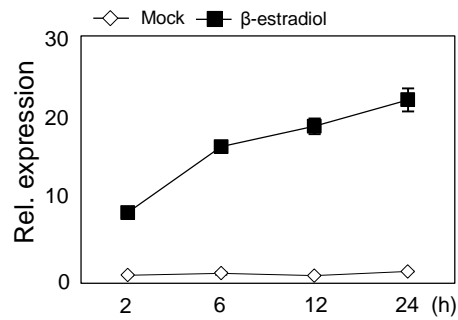

**Supplemental Figure 6.** Expression of *DEWAX* Transcripts in Leaves of Transgenic *Arabidopsis* expressing *DEWAX* under the Control of a  $\beta$ -Estradiol Inducible Promoter after  $\beta$ -Estradiol Treatment.

Three-week-old transgenic plants expressing *DEWAX* under the control of a  $\beta$ -estradiol inducible promoter were sprayed with 10  $\mu$ M  $\beta$ -estradiol or ethanol (mock). Total RNA was isolated from leaves, which were harvested 2, 6, 12, and 24 h after  $\beta$ -estradiol treatment, and subjected to qRT-PCR analysis. Data were statistically analyzed using Student's *t*-test ( $*P < 0.01$ ). Error bars indicate  $\pm$  SD of the mean of triplicate experiments.

## Supplemental Figure 7

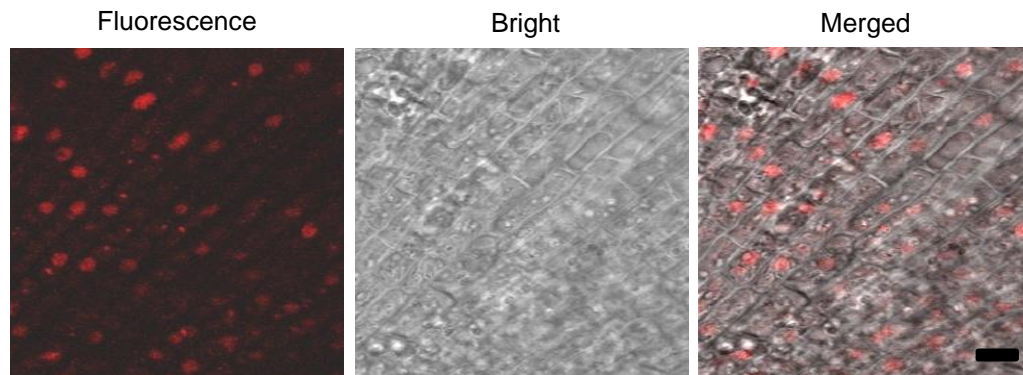

**Supplemental Figure 7.** Subcellular Localization of the *DEWAX* Gene in Transgenic Plant Root.

The 35S:DEWAX:mRFP constructs were introduced into *Arabidopsis* plants. Fluorescent signals in a transgenic plant root were visualized under a confocal laser scanning microscope. Bar is 50  $\mu$ m.

## Supplemental Figure 8

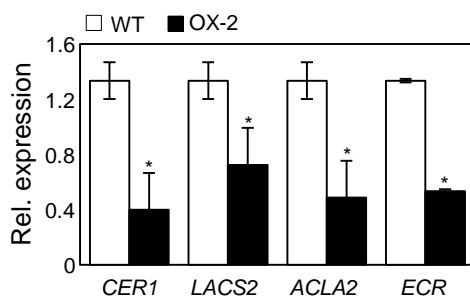

**Supplemental Figure 8.** Expression of *CER1*, *LACS2*, *ACLA2*, and *ECR* in the Leaves of the Wild Type and *DEWAX* Overexpression Line.

Total RNAs were isolated from leaves of the wild type and *DEWAX* overexpression line (OX-2), and subjected to qRT-PCR analysis. Data were statistically analyzed using Student's *t*-test (\**P* < 0.01). Error bars indicate  $\pm$  SD of the mean of triplicate experiments.



## Supplemental Figure 9

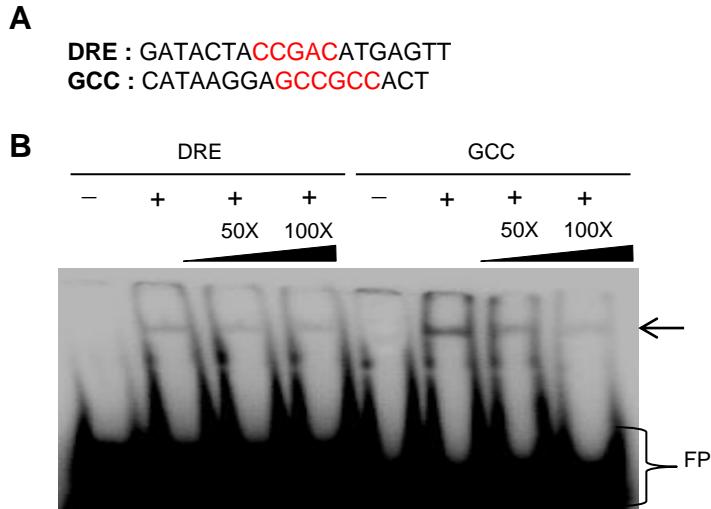

**Supplemental Figure 9.** Electrophoretic Mobility Shift Assay of DEWAX to DRE and GCC Motifs.

**(A)** Nucleotide sequences of the DRE and GCC Motifs. Core binding sequences are shown in red.

**(B)** Dose-dependent binding of MBP-DEWAX to the DRE and GCC motifs. The fusion protein, maltose binding protein (MBP):DEWAX (5  $\mu$ g) was purified from *Escherichia coli* and incubated with  $^{32}$ P-labeled DRE- and GCC motifs with or without competitor DNA fragments. The reaction mixtures were electrophoresed on 10% native PAGE gels, dried, and scanned using a phosphorimager. The DNA-protein binding complexes are indicated by an arrow. -, Absence of MBP:DEWAX; +, Presence of MBP:DEWAX; FP, Free probe.

## Supplemental Figure 10

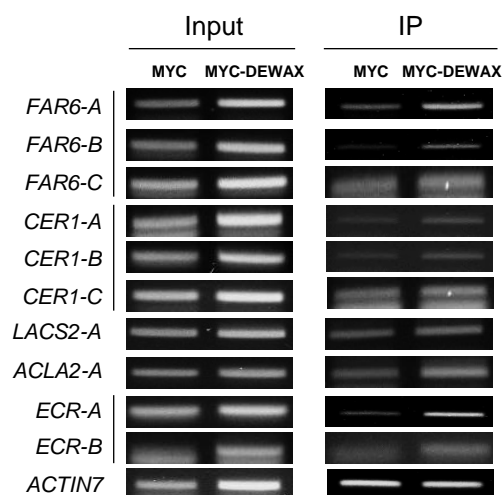

### **Supplemental Figure 10.** Chromatin Immunoprecipitation (ChIP) Assay in 35S:MYC and 35S:MYC-DEWAX Transgenic Plants.

Total protein extracts from 35S:MYC and 35S:MYC-DEWAX transgenic plants grown on MS-agar plates for 2 weeks were immunoprecipitated with an anti-MYC antibody. Fragmented genomic DNA was eluted from the protein-DNA complexes and subjected to PCR analysis. The *ACTIN7* gene was used to determine the quantity and quality of the cDNAs. Input, Total protein extracts; IP, Immunoprecipitated protein extracts.

## Supplemental Figure 11

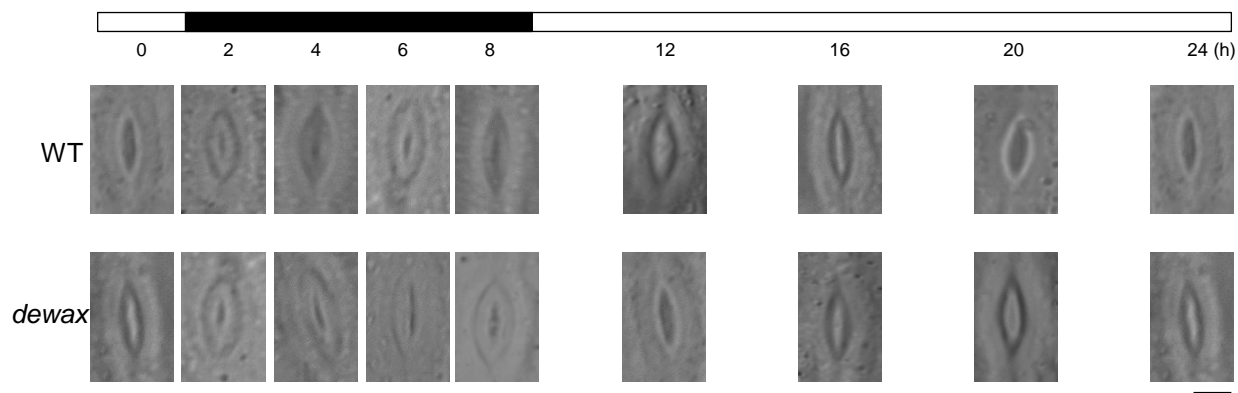

**Supplemental Figure 11.** Stomatal Apertures in Wild Type and *dewax* during Daily Light and Dark Cycle.

DIC images of stem epidermal peels of 4-week-old wild type and *dewax*, which were harvested 2 h, 4 h, 6 h, and 8 h after the lights were turned off, and 4 h, 8 h, 12 h, and 16 h after the lights came on, were observed under the DM2500 microscope. Black box; dark period, White box; light period. Bar indicates 20  $\mu$ m.

**Supplemental Table 1.** List of Genes that Are Involved in Wax Biosynthesis and Accumulation and that Are Down-Regulated in Stems of the *DEWAX* Overexpression Line (OX-2) Relative to the Wild Type.

| Locus     | Expression level |      |      | Gene  | Annotation                     |
|-----------|------------------|------|------|-------|--------------------------------|
|           | FC               | WT   | OX-2 |       |                                |
| At3g56700 | -14.1            | 817  | 57   | FAR6  | Fatty acyl-CoA reductase       |
| At4g22490 | -2.4             | 130  | 53   | LTP6  | Lipid transfer protein         |
| At1g02205 | -2.3             | 5795 | 2518 | CER1  | Alkane-forming enzyme          |
| At1g49430 | -1.8             | 294  | 162  | LACS2 | Long-chain acyl-CoA synthetase |
| At1g60810 | -1.8             | 2675 | 1469 | ACLA2 | ATP citrate lyase A subunit    |
| At3g55360 | -1.5             | 3101 | 2124 | ECR   | Enoyl-CoA reductase            |

**Supplemental Table 2.** Nucleotide Sequences of Promoter Regions of Wax Biosynthetic Genes regulated by DEWAX

| Gene  | Region | Position      | Nucleotide Sequences of Promoter Regions                                                                                                                                                                                                                                  |
|-------|--------|---------------|---------------------------------------------------------------------------------------------------------------------------------------------------------------------------------------------------------------------------------------------------------------------------|
| FAR6  | A      | -1693 ~ -1467 | cttcctgctcacattcctgccatgtgcagaaattggggcagggatatgttcaactttctgctact<br>aattgagtgatgatggaggattgatgaacagaagaagctccgaaggaagtaactcctgataact<br>ctgctctgataagaacaacaaaaaagtataagtgctacgcagagaacaatgagtgaaggattg<br>aattggtcctcg                                                  |
|       | B      | -846 ~ -702   | gtaggtacacattaacgttattgaatattagcccaaaacacagaagttcgttcaccttagcttgatta<br>gtttgattgcatgtaatatggctcgtcattacaagaaaagcttcgtgaatcacaatcgaccaacgtgtac                                                                                                                            |
|       | C      | -218 ~ -83    | ccacgaggccaaaacacagcttactaggtccacatgtgatccgacctaaccacattaattcctaact<br>aataactttctctatataactcccactaaagccctaaaaagaccactcaaaagcttc                                                                                                                                          |
| CER1  | A      | -915 ~ -755   | ccctgttacccttgggtccacgtgcttcatatatttagaaaggcaaaaaaattcgtcgtatgatgctt<br>agttaaattttataaaactcaataaaaacttcagaaacagtgctatgatcattacatcttaactaagtgat<br>atatctgcgtgcc                                                                                                          |
|       | B      | -412 ~ -298   | gcatcaatacctaacaacatgcccaacttggtcattagattctttcattgtaaaatacccttaccttcaata<br>atatccagaaataaatatataagccatccatcaaccgg                                                                                                                                                        |
|       | C      | -317 ~ -152   | caagccatccatcaaccgtgcttctcaaggcatggatgatcagaacatcgatgaaggtggg<br>aggggtaattagctgagtgatcataaatgaggatccatgtggagatcatggaatgtagtagtacatgtt<br>ggtcttagctggccaccacaagg                                                                                                         |
| LACS2 | A      | -1595 ~ -1321 | ctttgtagtttaaccgtgtaaaaacttttacctataaaaaagaaaaaaataataggataagttttttat<br>atataccataataaataaacatcgccgaaaattaaattgTaaggctggggaagaattattgtcagc<br>caacaatcacgttatggtcaaattggatatttcttataaaaagtaagaaaaagcatgttttgtaaatt<br>taattcatagaaaatgctgaaatttccattattataaagattatagattc |
| ACLA2 | A      | -1055 ~ -897  | gatcactagttcgttaccataagcagaatcccttatagctgaggtctgtccacttcattacagcctatgga<br>ccaatgcagaacttttgaagcgagccattatagccatgctgtttcctagataagcctcctttattagaggt<br>atatatcggttac                                                                                                       |
| ECR   | A      | -826 ~ -733   | caactactccatgtggttaagggccgggatcatttattttgcatctttatagacaatgacaaggatt<br>cgttctcattactccatccc                                                                                                                                                                               |
|       | B      | -291 ~ -153   | gtaattactaatggtgatccttaaaacaaagccataatttgaattgcaacaatgtttttgttgagtaa<br>aaacaaaaaaaatgatgggagcaactaaaaatgtaaatggtccaatctaatacgcataag                                                                                                                                      |

\*GCC motifs are shown in red.

**Supplemental Table 3.** Primers Used in This Study.

| Reaction                                          | Primer name           | Sequence information              |
|---------------------------------------------------|-----------------------|-----------------------------------|
| Mutant<br>isolation                               | DEWAX F1              | 5'-cttattctcctgtcttgc             |
|                                                   | DEWAX R1              | 5'-tctaacaggttcttggctc            |
|                                                   | LBa1                  | 5'-tggttcacgtagtgggccaatcg        |
| Promoter<br>analysis                              | DEWAX PF1             | 5'-ggtcgacgtcaacgtacgatgacgttttc  |
|                                                   | DEWAX PR1             | 5'-ccccgggacctcaaaagtctccctttctcc |
| Overexpression<br>and Subcellular<br>localization | DEWAX cNDA F1         | 5'-gagctcatggagacttttgaggaaag     |
|                                                   | DEWAX cDNA R1         | 5'-cccggggtttgatgacgatgatgaag     |
| qRT-PCR<br>of wax<br>biosynthetic genes           | FAR6 real F1          | 5'-ggaggaggattgagcacgaag          |
|                                                   | FAR6 real R1          | 5'-gtaatgctcccagtcaatgcc          |
|                                                   | LTP6 real F1          | 5'-cactgccctcaatggcctc            |
|                                                   | LTP6 real R1          | 5'-ggacactggaaaccgatagg           |
|                                                   | ACLA2 real F1         | 5'-caatggcataatccgagctc           |
|                                                   | ACLA2 real R1         | 5'-cctccttgcatatacctgtc           |
|                                                   | LACS1 real F1         | 5'-ccggttcaaccaatcattgc           |
|                                                   | LACS1 real R1         | 5'-cacacacatcatcgcaaac            |
|                                                   | KCS1 real F1          | 5'-ggcttataccgaagctaagg           |
|                                                   | KCS1 real R1          | 5'-ccggttcaaccaatcattgc           |
|                                                   | CER1 real F1          | 5'-catattgcacgccttagaag           |
|                                                   | CER1 real R2          | 5'-ttaatgatgtggaaggaggagagg       |
|                                                   | CER2 real F1          | 5'-agatagattcggttggcgag           |
|                                                   | CER2 real R1          | 5'-gtttcggcgatattcag              |
|                                                   | CER3 real F1          | 5'-gtgatctagcagctatgaag           |
|                                                   | CER3 real R1          | 5'-gatacggccaacatcaatgg           |
|                                                   | CER4 real F1          | 5'-atctctatcagccttacctc           |
|                                                   | CER4 real R1          | 5'-gcagccaataacatgtgtg            |
|                                                   | ECR real F1           | 5'-tcaacatcgctactcagacc           |
|                                                   | ECR real R2           | 5'-ggaatggaggaagtatcacccatc       |
|                                                   | KCS2 real F1          | 5'-cgctaaacagcttctcag             |
|                                                   | KCS2 real R1          | 5'-gagttggtatttgagcgg             |
|                                                   | KCS6 real F1          | 5'-gtgaagccctcaaggcaaac           |
| KCS6 real R1                                      | 5'-cgaagccagcttgaatcc |                                   |
| WBC11 real F1                                     | 5'-gttccaacttctcatggg |                                   |

|                                      |                                  |                                    |
|--------------------------------------|----------------------------------|------------------------------------|
|                                      | WBC11 real R2                    | 5'-cttgaagcactcccttggtg            |
|                                      | KCR1 real F1                     | 5'-actctgtttatgctggtgc             |
|                                      | KCR1 real R1                     | 5'-tgcaactaagaaggatgctc            |
|                                      | LACS2 real F1                    | 5'-ccctcattgctcagatatgggtc         |
|                                      | LACS2 real R1                    | 5'-tgcggtagagttaagctcatccaag       |
| Transcription<br>activation<br>assay | CER1 pro F2                      | 5'-ggtcgaccatacatctatgtccccttc     |
|                                      | CER1 pro R2                      | 5'-aactagtataaccgtcgaatgtaatatg    |
|                                      | FAR6 pro F2                      | 5'-ggtcgacgcttcacattcctgcatgtg     |
|                                      | FAR6 pro R1                      | 5'-aactagtggagcttaatttgaagtggtc    |
|                                      | LTP6 pro F1                      | 5'-ggtcgacgaatcacgttgagtttac       |
|                                      | LTP6 pro R1                      | 5'-aactagtggatgctttcgatgatgtg      |
|                                      | LACS2 pro F2                     | 5'-ggtgaggtctatcacaatc             |
|                                      | LACS2 pro R1                     | 5'-aactagtggaggaatgaagaagataagg    |
|                                      | ACLA2 pro F2                     | 5'-gttgggagttgaaacgtttg            |
|                                      | ACLA2 pro R1                     | 5'-aactagtggattcgagacctttgattc     |
|                                      | ECR pro F1                       | 5'-ggacctactatgtcgacacacaacatcaaac |
| ECR pro R1                           | 5'-tacgtcgacggtgcttaagcggagcaaac |                                    |
| ChIP assay                           | DEWAX myc F1                     | 5'-ccccgggaaatggagacttttgaggaaagc  |
|                                      | DEWAX myc R1                     | 5'-ccccgggttagttgatgacgatgatgaag   |
|                                      | FAR6 CHIP-AF1                    | 5'-cttctgcttcacattcctg             |
|                                      | FAR6 CHIP AR1                    | 5'-cgaggcaactaattcaaatcc           |
|                                      | FAR6 CHIP BF2                    | 5'-gtaggttacacattaaacg             |
|                                      | FAR6 CHIP BR2                    | 5'-gtacacgttggtcgattg              |
|                                      | FAR6 CHIP CF3                    | 5'-ccaagaggccaaaacacag             |
|                                      | FAR6 CHIP CR3                    | 5'-ggaagcttaatttgaagtggtc          |
|                                      | CER1 CHIP AF1                    | 5'-ccctgttacccttggtgcc             |
|                                      | CER1 CHIP AR1                    | 5'-ggcacgcagatatatacacttag         |
|                                      | CER1 CHIP BF2                    | 5'-gcatcaatacctaacacatgc           |
|                                      | CER1 CHIP BR2                    | 5'-cggttgatggatggcttc              |
|                                      | CER1 CHIP CF3                    | 5'-gaagccatccatcaaccg              |
|                                      | CER1 CHIP CR3                    | 5'-cttgtggtggggccag                |
|                                      | ECR CHIP AF1                     | 5'-cacactacttccatgtgg              |
|                                      | ECR CHIP AR1                     | 5'-gggatggagtaatgagaac             |
|                                      | ECR CHIP BF2                     | 5'-gtaattactaatggtgatcc            |
|                                      | ECR CHIP BR2                     | 5'-cttatcgattagattgggac            |
|                                      | LCAS2 CHIP AF1                   | 5'-ctttgtagtttaaccgtg              |

|      |                    |                        |
|------|--------------------|------------------------|
|      | LACS2 CHIP AR1     | 5'-cataacgtgattgttggc  |
|      | ACLA2 CHIP AF1     | 5'-gatcactagttcgttacc  |
|      | ACLA2 CHIP AR1     | 5'-gtaacgcatatatacctc  |
| EMSA | DRE cis-element F1 | 5'-gatactaccgacatgagtt |
|      | GCC cis-element F1 | 5'-cataaggagccgccact   |
|      | DRE cis-element R1 | 5'-aactcatgctggtagtatc |
|      | GCC cis-element R1 | 5'-agtggcggctccttatg   |
